# Supplementary material
Source: Elsevier journal article supplement (https://www.sciencedirect.com/science/article/pii/S0210569122000675)
Supplement: mmc1 [file S0210569122000675:mmc1.pdf]

**Table S1.** Univariate analysis of risk factors associated with 30-day mortality in the acute heart failure groups (n=627).

|                                   | <b>Alive<br/>N = 516</b> | <b>Deceased<br/>N = 111</b> | <b>P-value*</b> |
|-----------------------------------|--------------------------|-----------------------------|-----------------|
| Male                              | 317 (61.4%)              | 74 (66.7%)                  | 0.3             |
| Age, years                        | 68 (67-69)               | 71 (69-73)                  | 0.03            |
| BMI, Kg/m <sup>2</sup>            | 28.6 (28-29.2)           | 28.8 (27.4-30.1)            | 0.84            |
| APACHE II                         | 18 (17-18)               | 26 (23-29)                  | <0.001          |
| Charlson comorbidity index        | 4 (3-4)                  | 4 (4-5)                     | 0.02            |
| <b>Comorbidities</b>              |                          |                             |                 |
| Hypertension                      | 345 (66.9%)              | 74 (66.7%)                  | 0.97            |
| Diabetes                          | 220 (42.6%)              | 46 (41.4%)                  | 0.82            |
| Dyslipidemia                      | 261 (50.6%)              | 54 (48.6%)                  | 0.71            |
| Cardiomyopathy                    |                          |                             |                 |
| Ischemic                          | 138 (26.7%)              | 44 (39.6%)                  | 0.007           |
| Valvular                          | 102 (19.8%)              | 24 (21.6%)                  | 0.66            |
| Dilated                           | 53 (10.3%)               | 10 (9%)                     | 0.69            |
| Hypertrophic                      | 49 (9.5%)                | 7 (6.3%)                    | 0.28            |
| Chronic heart failure             | 168 (32.6%)              | 45 (40.5%)                  | 0.61            |
| Peripheral arterial disease       | 63 (12.2%)               | 20 (18%)                    | 0.10            |
| Stroke                            | 57 (11%)                 | 11 (9.9%)                   | 0.73            |
| Anemia                            | 79 (15.3%)               | 23 (9.9%)                   | 0.16            |
| Chronic renal failure             | 111 (21.5%)              | 30 (27%)                    | 0.21            |
| COPD                              | 83 (16.1%)               | 20 (18%)                    | 0.62            |
| <b>Symptoms/signs at onset</b>    |                          |                             |                 |
| Pulmonary edema                   | 398 (77.1%)              | 94 (84.7%)                  | 0.08            |
| Cardiogenic shock                 | 183 (35.5%)              | 85 (76.6%)                  | <0.001          |
| Peripheral edema                  | 147 (28.5%)              | 61 (55%)                    | <0.001          |
| <b>Underlying cardiac disease</b> |                          |                             |                 |
| Ischemic heart disease            | 187 (36.2%)              | 47 (42.3%)                  | 0.23            |
| Cardiomyopathy                    | 212 (41.1%)              | 40 (36%)                    | 0.32            |
| Arrhythmia                        | 174 (33.7%)              | 38 (34.2%)                  | 0.92            |
| Valvulopathy                      | 112 (21.7%)              | 26 (23.4%)                  | 0.69            |
| <b>Precipitating factors</b>      |                          |                             |                 |
| Not known                         | 263 (51%)                | 58 (52.3%)                  | 0.81            |
| Sepsis/septic shock               | 120 (23.3%)              | 29 (26.1%)                  | 0.52            |
| Fluid overload                    | 95 (18.4%)               | 18 (16.2%)                  | 0.58            |
| Renal failure                     | 76 (14.7%)               | 17 (15.3%)                  | 0.87            |
| Anemia                            | 46 (8.9%)                | 10 (9%)                     | 0.97            |
| Changes in chronic drugs          | 21 (4.1%)                | 5 (4.5%)                    | 0.83            |

| <b>Diagnosis and tests performed</b> |                  |                   |        |
|--------------------------------------|------------------|-------------------|--------|
| Diagnostic delay                     | 47 (9.1%)        | 27 (24.3%)        | <0.001 |
| NT-proBNP (ng/L)                     | 3977 [1995-8575] | 8269 [3542-21574] | 0.058  |
| Troponin (ng/L)                      | 23 [0.8-217]     | 161 [5.6-2055]    | 0.61   |
| Hemodynamic monitoring               | 107 (20.7%)      | 35 (31.5%)        | 0.014  |
| Echocardiography                     | 380 (73.6%)      | 80 (72.1%)        | 0.73   |
| LVEF                                 | 44 (43-46)       | 38 (34-41)        | <0.001 |
| LVEF < 50%                           | 191 (37%)        | 59 (53.2%)        | 0.07   |
| DD                                   | 25 (4.8%)        | 5 (4.5%)          | 0.69   |
| RVD                                  | 85 (16.5%)       | 21 (18.9%)        | 0.11   |
| <b>Interventions</b>                 |                  |                   |        |
| Oxygen                               | 447 (86.6%)      | 102 (91.9%)       | 0.13   |
| Morphine                             | 253 (49%)        | 60 (54.1%)        | 0.34   |
| Diuretic                             | 406 (78.7%)      | 83 (74.8%)        | 0.37   |
| Nitrates                             | 159 (30.8%)      | 18 (16.2%)        | 0.002  |
| Inotropes                            | 120 (23.3%)      | 46 (41.4%)        | <0.001 |
| Vasopressors                         | 161 (31.2%)      | 77 (69.4%)        | <0.001 |
| Antiarrhythmic                       | 113 (21.9%)      | 35 (31.5%)        | 0.03   |
| Beta blockers                        | 103 (20%)        | 5 (4.5%)          | <0.001 |
| Coronary angiography                 | 155 (30%)        | 27 (24.3%)        | 0.23   |
| Mechanical support                   | 11 (2.1%)        | 7 (6.3%)          | 0.017  |
| Pacemaker                            | 38 (7.4%)        | 8 (7.2%)          | 0.95   |
| Cardioversion                        | 18 (3.5%)        | 23 (20.7%)        | <0.001 |
| CPAP or NIV                          | 180 (34.9%)      | 35 (31.5%)        | 0.5    |
| Invasive MV                          | 140 (27.1%)      | 70 (63.1%)        | <0.001 |
| RBC transfusion                      | 107 (20.7%)      | 21 (18.9%)        | 0.66   |
| Renal replacement therapy            | 40 (7.8%)        | 15 (13.5%)        | 0.05   |

Data are presented as n (%) with means (95% confidence interval) if normally distributed or medians [interquartile range] if non-normally distributed.

\* For univariate comparisons, we used the Student's t or Mann-Whitney U tests as appropriate based on the data distribution. Fisher's exact test was used to compare categorical data.

BMI: Body mass index; APACHE: Acute Physiology and Chronic Health Evaluation; COPD: Chronic obstructive pulmonary disease; NT-Pro-BNP: N terminal portion from brain natriuretic pro-peptide; LVEF: Left ventricular ejection fraction; DD: Diastolic dysfunction; RVD: Right ventricular dysfunction; CPAP: Continuous positive airway pressure; NIV: Non-invasive ventilation; MV: mechanical ventilation; RBC: Red blood cells.
